# Supplementary material for: Sustainability of Nursing Leadership and Its Contributing Factors in a Developing Economy: A Study in Mongolia
Source: Frontiers journal article supplement (doi:10.3389/fpubh.2022.900016), 2022-05-25
Supplement: Data_Sheet_1.pdf [file Data_Sheet_1.pdf]

## Appendix A

|   | Variable          |                                              |
|---|-------------------|----------------------------------------------|
| 1 | Gender            | <input type="checkbox"/> Male                |
|   |                   | <input type="checkbox"/> Female              |
| 2 | Age               | <input type="checkbox"/> 20-30 years         |
|   |                   | <input type="checkbox"/> 31-40 years         |
|   |                   | <input type="checkbox"/> 41-50 years         |
|   |                   | <input type="checkbox"/> 51-60 years         |
|   |                   | <input type="checkbox"/> 61-70 years         |
| 3 | Education         | <input type="checkbox"/> Associate           |
|   |                   | <input type="checkbox"/> Diploma             |
|   |                   | <input type="checkbox"/> Bachelor            |
|   |                   | <input type="checkbox"/> Masters             |
|   |                   | <input type="checkbox"/> Other               |
| 4 | Position          | <input type="checkbox"/> Head nurse          |
|   |                   | <input type="checkbox"/> Nurse               |
|   |                   | <input type="checkbox"/> Director nurse      |
|   |                   | <input type="checkbox"/> Methodologist nurse |
|   |                   | <input type="checkbox"/> Other               |
| 5 | Years Experience  | <input type="checkbox"/> 0-10 years          |
|   |                   | <input type="checkbox"/> 11-20 years         |
|   |                   | <input type="checkbox"/> 21-30 years         |
|   |                   | <input type="checkbox"/> 31-40 years         |
|   |                   | <input type="checkbox"/> 41-50 years         |
| 6 | Years in Position | <input type="checkbox"/> 0-5 years           |
|   |                   | <input type="checkbox"/> 6-10 years          |
|   |                   | <input type="checkbox"/> 11-15 years         |
|   |                   | <input type="checkbox"/> 16-20 years         |
|   |                   | <input type="checkbox"/> 21-25 years         |
|   |                   | <input type="checkbox"/> 26-30 years         |
|   |                   | <input type="checkbox"/> 31-35 years         |

| ORGANIZATIONAL STRUCTURE |                                    |                                    |
|--------------------------|------------------------------------|------------------------------------|
| 1                        | What level is your hospital?       | <input type="checkbox"/> Primary   |
|                          |                                    | <input type="checkbox"/> Secondary |
|                          |                                    | <input type="checkbox"/> Tertiary  |
| 2                        | Do you know the word "Leadership?" | <input type="checkbox"/> Yes       |
|                          |                                    | <input type="checkbox"/> No        |
| 3                        |                                    | <input type="checkbox"/> Yes       |
|                          |                                    | <input type="checkbox"/> No        |

|   |                                                                                    |                                        |
|---|------------------------------------------------------------------------------------|----------------------------------------|
|   | Do hospital policies and procedures have support the leadership of nurse managers? | <input type="checkbox"/> I do not know |
| 4 | What level of leadership responsibility does nurse manager?                        | <input type="checkbox"/> High          |
|   |                                                                                    | <input type="checkbox"/> Medium        |
|   |                                                                                    | <input type="checkbox"/> Low           |

Please indicate the extent to which you agree or disagree with the following statements:  
(1 – Strongly disagree, 2 – Disagree, 3 – Neutral, 4 – Agree, 5 – Strongly agree)

| WORK ENVIRONMENT |                                                                                                                |           |
|------------------|----------------------------------------------------------------------------------------------------------------|-----------|
| 1                | You have a stimulating, intellectual environment                                                               | 1 2 3 4 5 |
| 2                | The work associated with your position provides you with the opportunity to use a full range of nursing skills | 1 2 3 4 5 |
| 3                | The nursing manager environment allows you to make autonomous nursing care decisions to suit patient needs     | 1 2 3 4 5 |
| 4                | Nurses receive adequate praise for work well done from nursing administration                                  | 1 2 3 4 5 |
| 5                | The hospital organizational structure allows you to have a voice in policy making for nursing service          | 1 2 3 4 5 |
| 6                | Nurse manager has an enough time to participate in patient care procedure                                      | 1 2 3 4 5 |
| 7                | Good working relationships exist between you and your peers, including supervisor and physicians               | 1 2 3 4 5 |
| 8                | Does your hospital have electronic registration for nursing care service                                       | 1 2 3 4 5 |
| 9                | Encourages you to make adjustments in your nursing practice to suit patient needs                              | 1 2 3 4 5 |
| 10               | Your working environment offers an opportunity for professional growth                                         | 1 2 3 4 5 |
| 11               | I make sure that my part in the group is understood by the group members                                       | 1 2 3 4 5 |
| PERFORMANCE      |                                                                                                                |           |
| 1                | Position description of nurse manager is clear and adequate                                                    | 1 2 3 4 5 |
| 2                | <b>Performance of nurse's manager is directions of patient health care procedure</b>                           | 1 2 3 4 5 |
| 3                | <b>Nurse manager have nursing plan for each patient and check performance nursing procedure</b>                | 1 2 3 4 5 |
| 4                | Nurse manager schedules the work to be done.                                                                   | 1 2 3 4 5 |
| 5                | Nurse manager leads team nurses performance every day.                                                         | 1 2 3 4 5 |
| 6                | Nurse manager's teaching ability is good                                                                       | 1 2 3 4 5 |
| 7                | Hospital supply new medical nursing techniques by nurse manager's intention                                    | 1 2 3 4 5 |
| 8                | <b>Nurse managers care about professional development and medical research</b>                                 | 1 2 3 4 5 |
| 9                | Nurse manager evaluates comments or complain issued by patient about nursing care                              | 1 2 3 4 5 |
| 10               | Monitoring and controlling the performance of nursing support staff within the unit.                           | 1 2 3 4 5 |
| 11               | Nurse manager asks that group members to follow standard rules and regulations.                                | 1 2 3 4 5 |
| BEHAVIOR         |                                                                                                                |           |
| 1                | I consider the moral and ethical consequences of decisions.                                                    | 1 2 3 4 5 |
| 2                | I am friendly and approachable                                                                                 | 1 2 3 4 5 |
| 3                | I overcome attempts made to challenge my leadership                                                            | 1 2 3 4 5 |
| 4                | I drive hard when here is a job to be done                                                                     | 1 2 3 4 5 |
| PROBLEM SOLVER   |                                                                                                                |           |
| 1                | I can make accurate decisions.                                                                                 | 1 2 3 4 5 |

|                          |                                                                                       |           |
|--------------------------|---------------------------------------------------------------------------------------|-----------|
| 2                        | Autonomous nurse manager has to make decision for patient care                        | 1 2 3 4 5 |
| 3                        | The nursing department policy has to get nurse for problem-solving through direct way | 1 2 3 4 5 |
| TRANSFORMATIONAL ABILITY |                                                                                       |           |
| 1                        | I go beyond self-interest for the good of the group.                                  | 1 2 3 4 5 |
| 2                        | I make clear what one can expect to receive when performance goals are achieved.      | 1 2 3 4 5 |
| 3                        | I permit the members to use their own judgment in solving problems                    | 1 2 3 4 5 |
| NURSE LEADERSHIP         |                                                                                       |           |
| 1                        | How much do you know about nursing leadership management?                             | 1 2 3 4 5 |
| 2                        | What level do you think developing model nurse manager?                               | 1 2 3 4 5 |
| 3                        | Do hospital policies and procedures have support the leadership of nurse managers?    | 1 2 3 4 5 |
